# Supplementary figures and images for: Yttrium-doped lithium and potassium clusters: magnetic superatoms and their interaction with hydrogen
Source: Royal Society of Chemistry journal article supplement (doi:10.1039/d5cp04393j), 2026-01-01

$^1K_2$

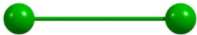

3.92

$^3KY$

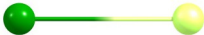

4.09

Supplement: d5cp04393j2.zip [file fig_1-eps-converted-to.pdf › SI_Source/fig_1-eps-converted-to.pdf]

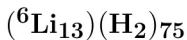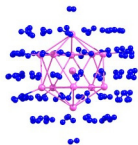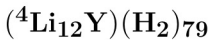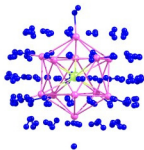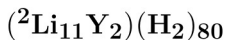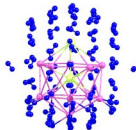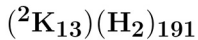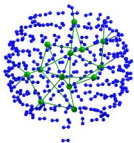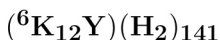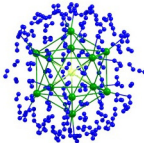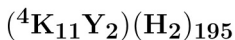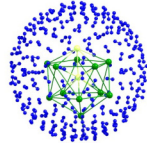

Supplement: d5cp04393j2.zip [file fig_2-eps-converted-to.pdf › SI_Source/fig_2-eps-converted-to.pdf]

(a)

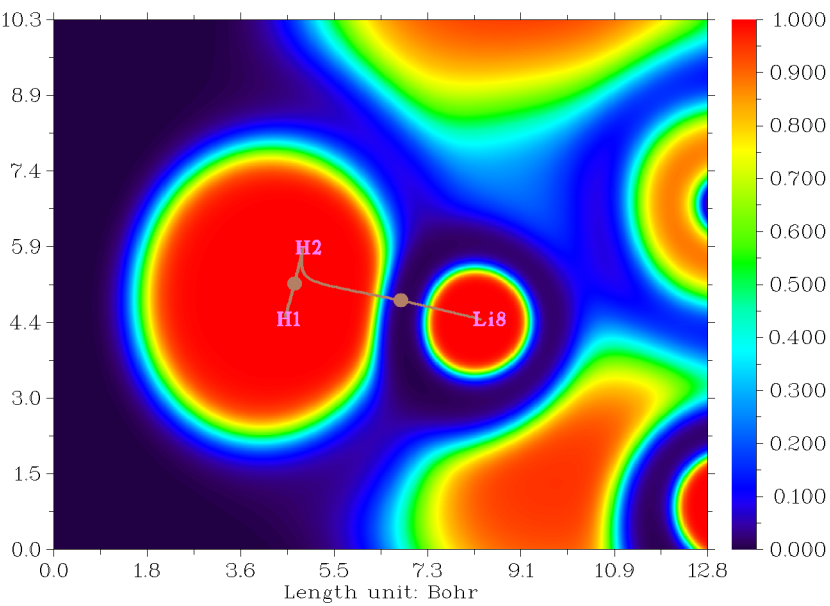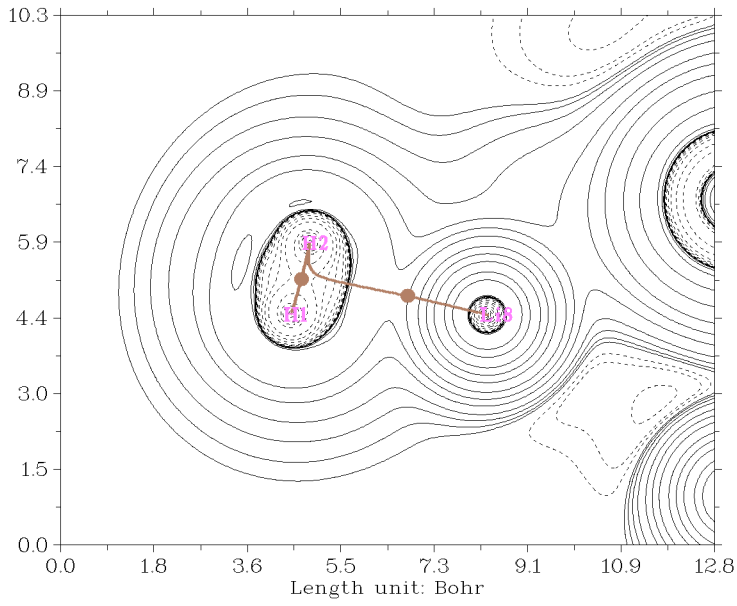

(b)

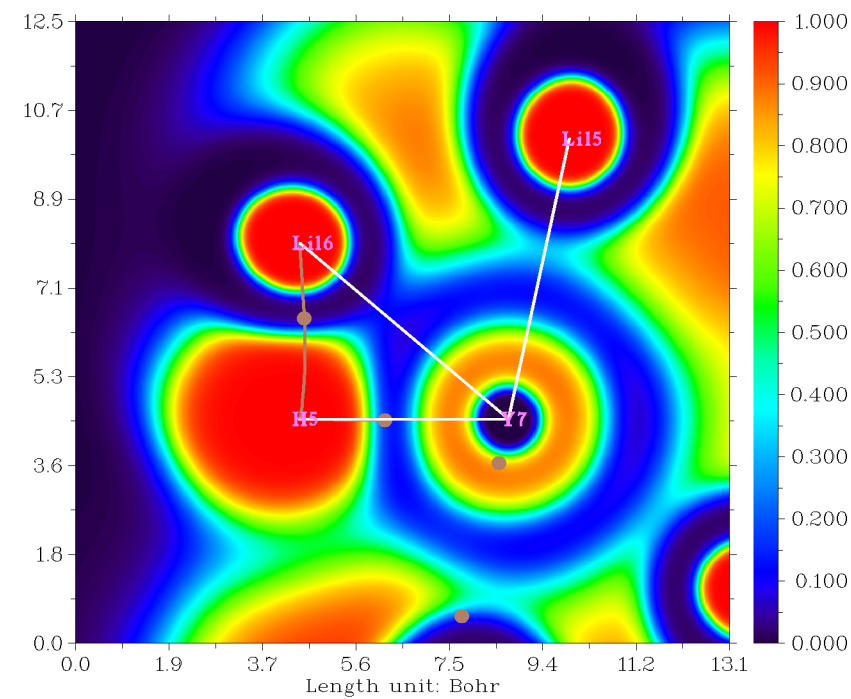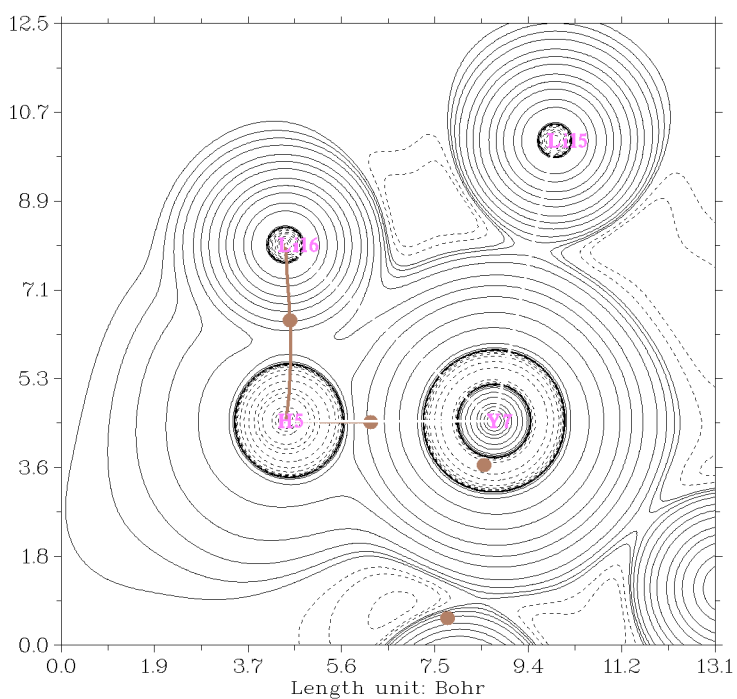

(c)

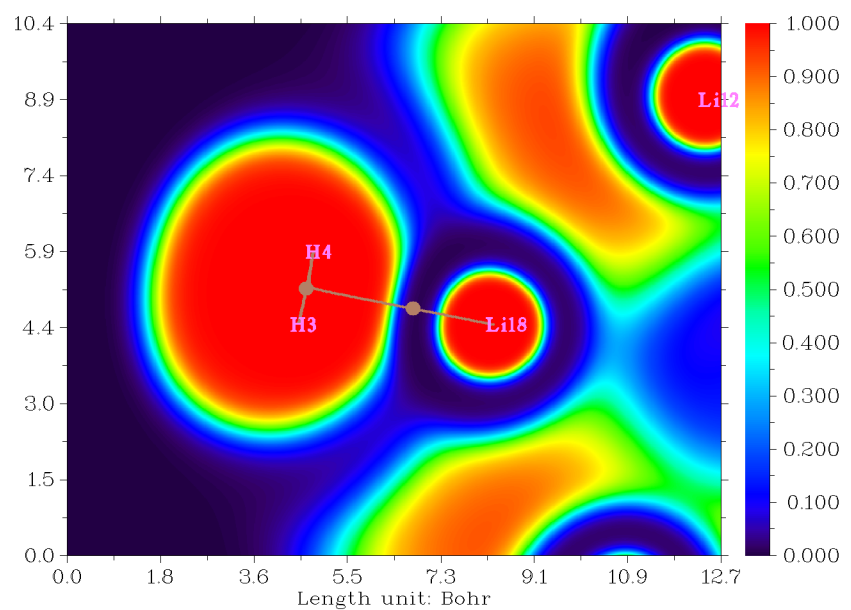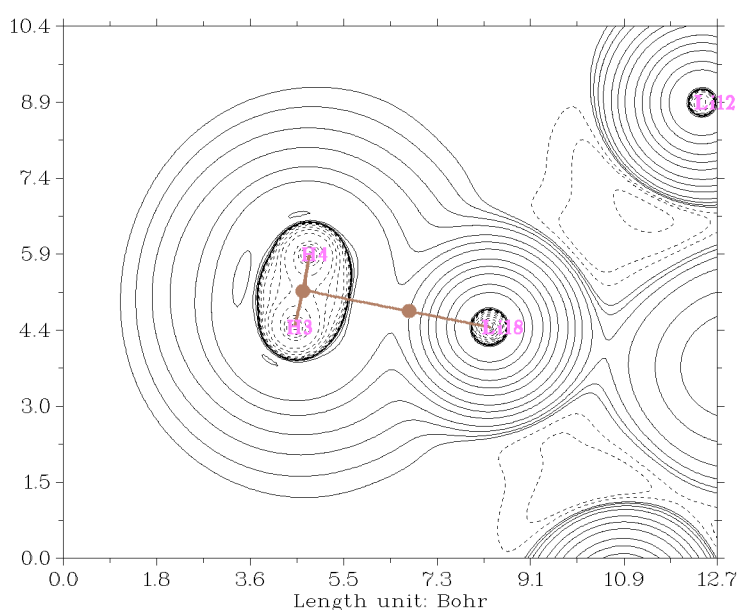

(d)

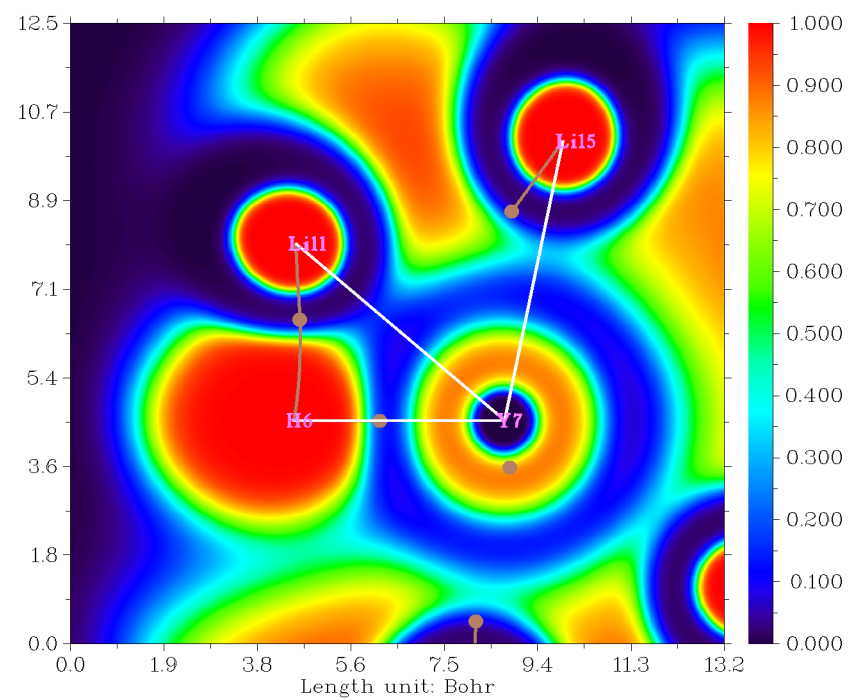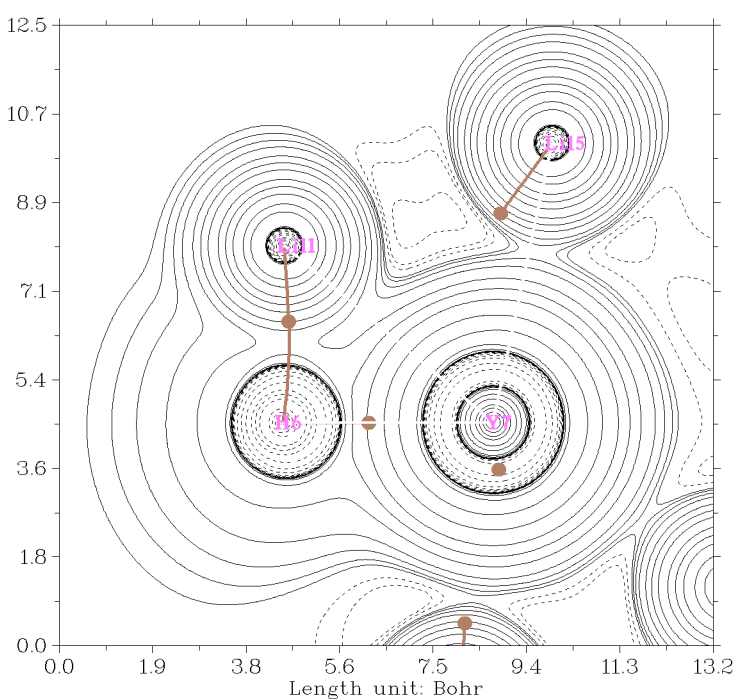

Supplement: d5cp04393j2.zip [file fig_3-eps-converted-to.pdf › SI_Source/fig_3-eps-converted-to.pdf]

(a)

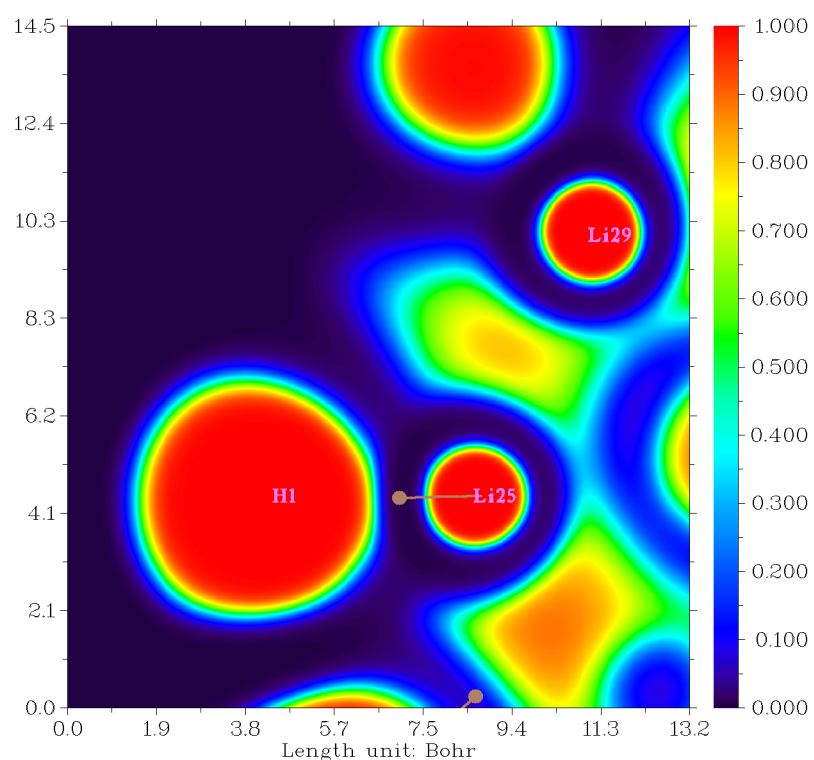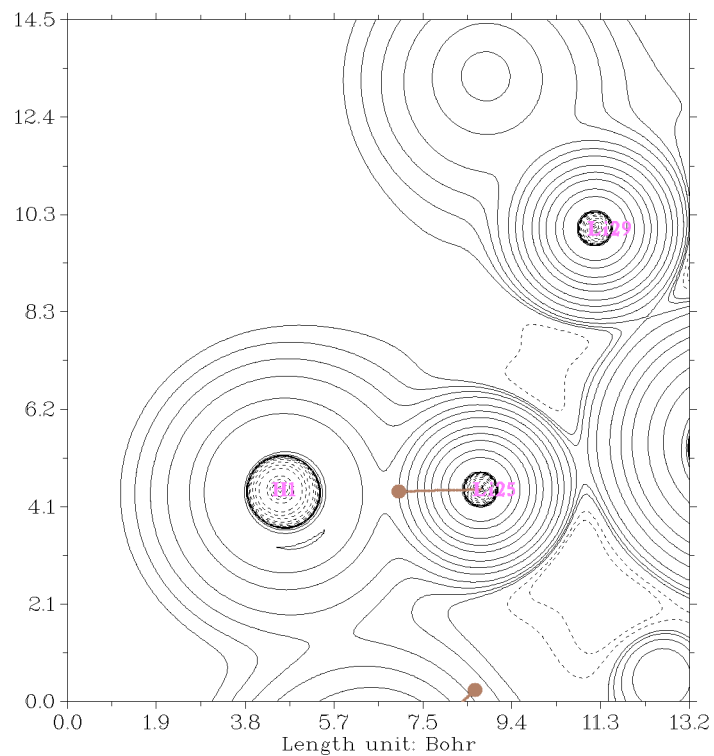

(b)

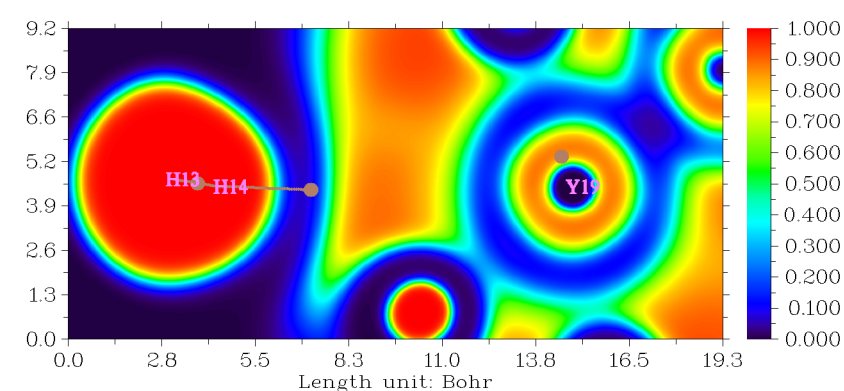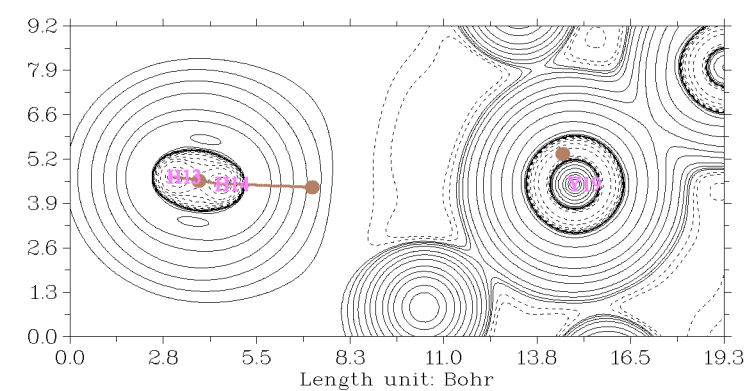

(c)

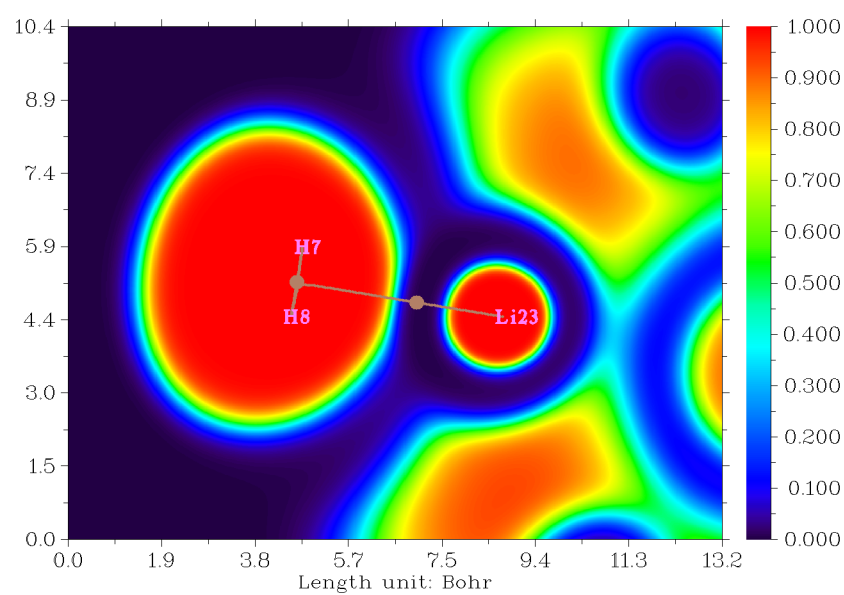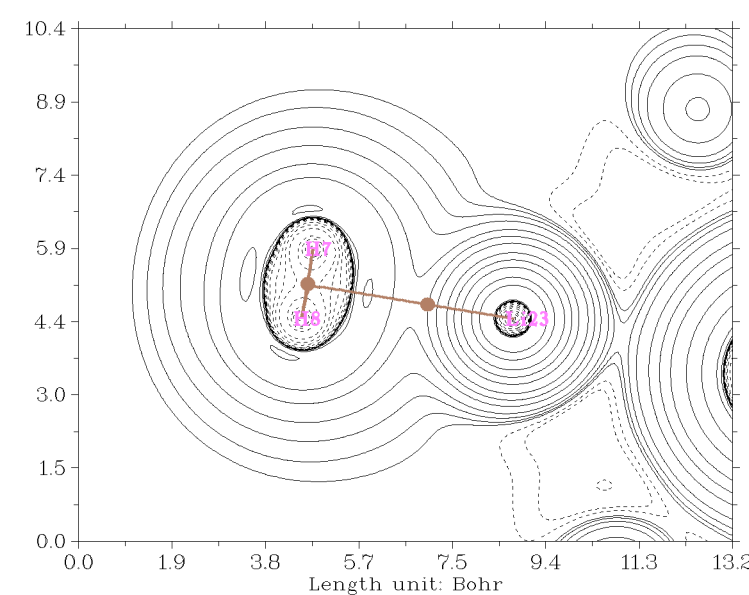

(d)

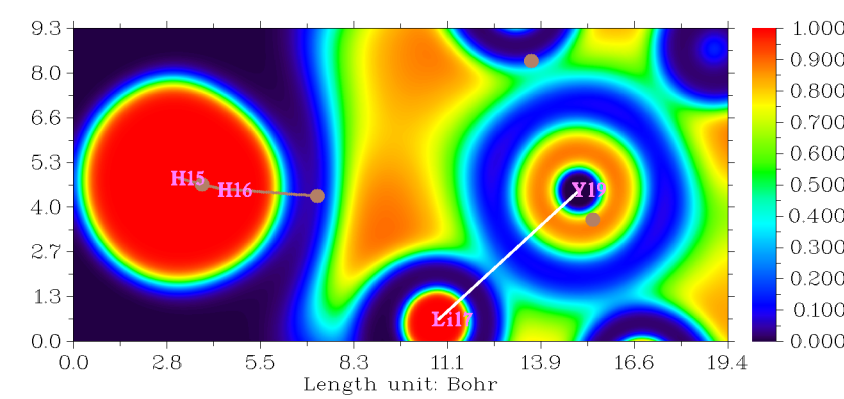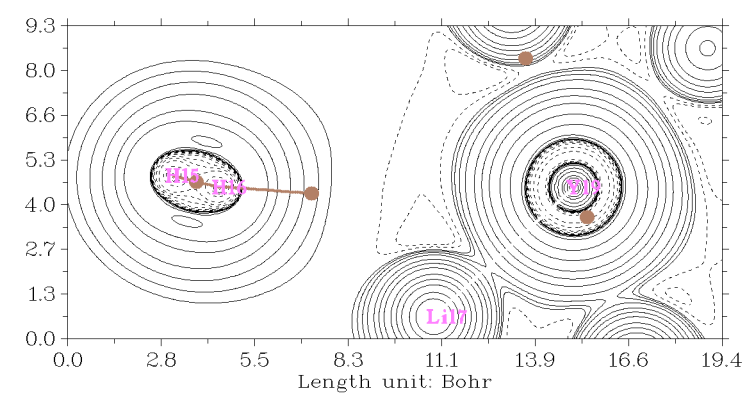

(e)

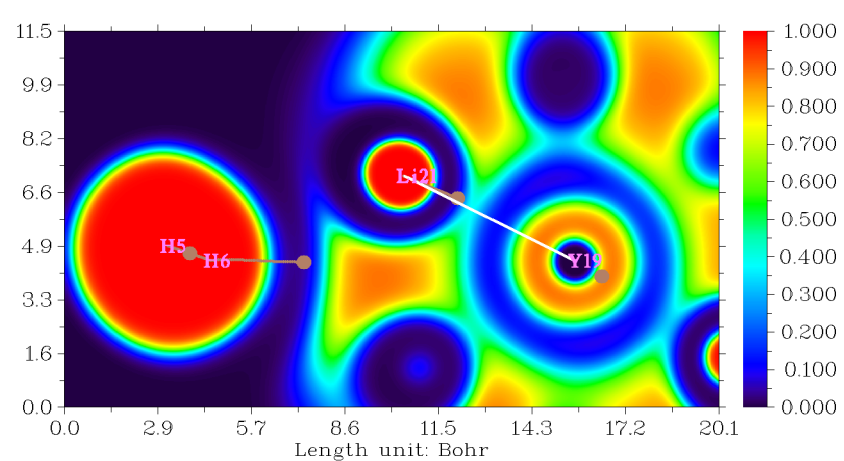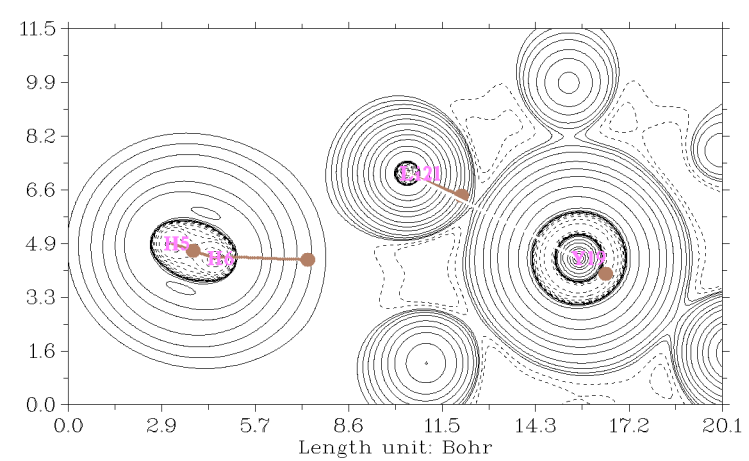

(f)

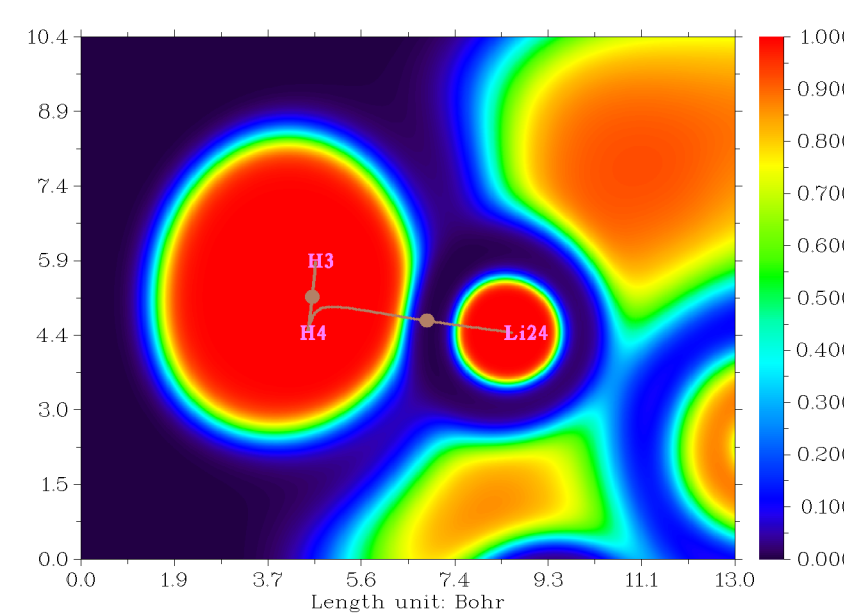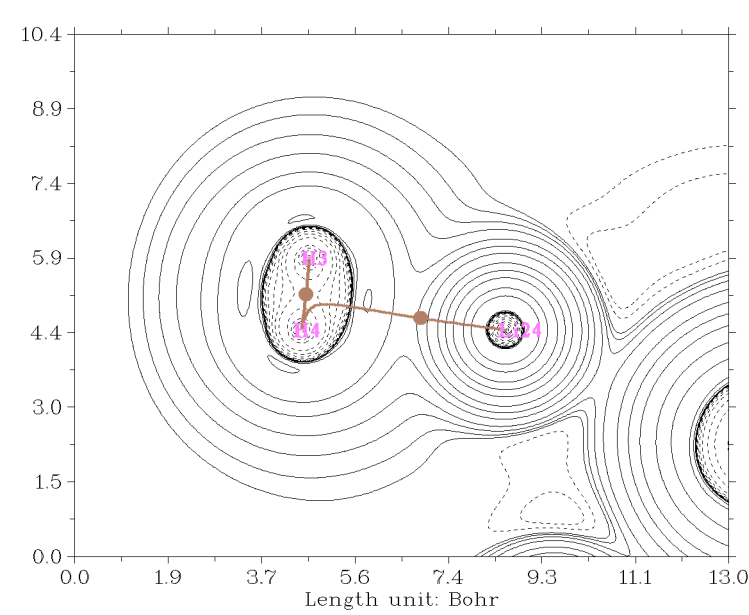

Supplement: d5cp04393j2.zip [file fig_4-eps-converted-to.pdf › SI_Source/fig_4-eps-converted-to.pdf]

(a)

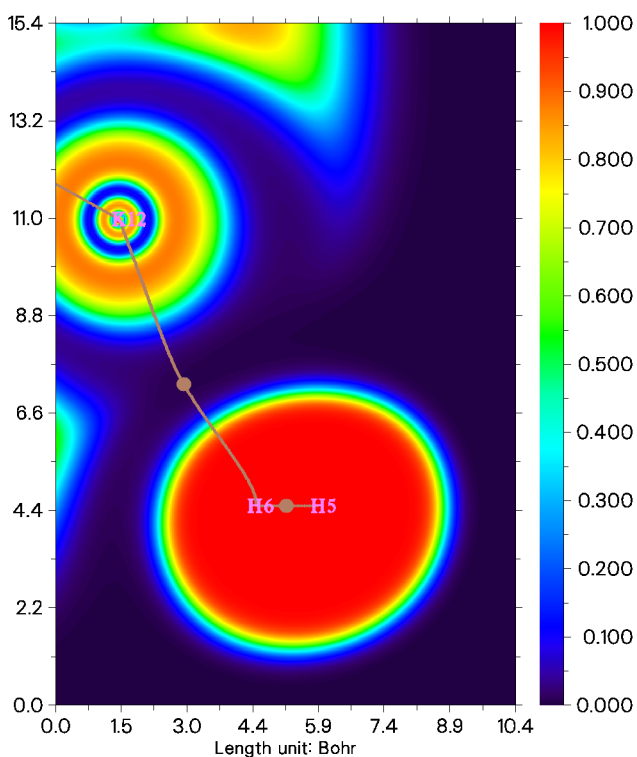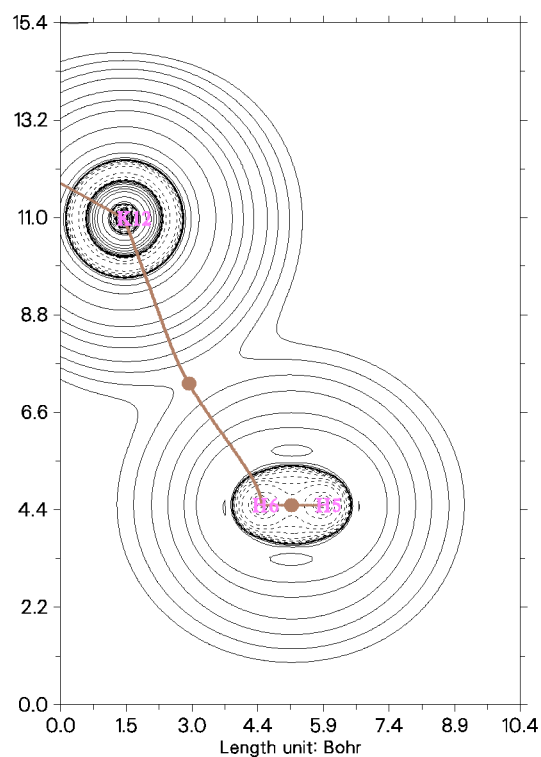

(b)

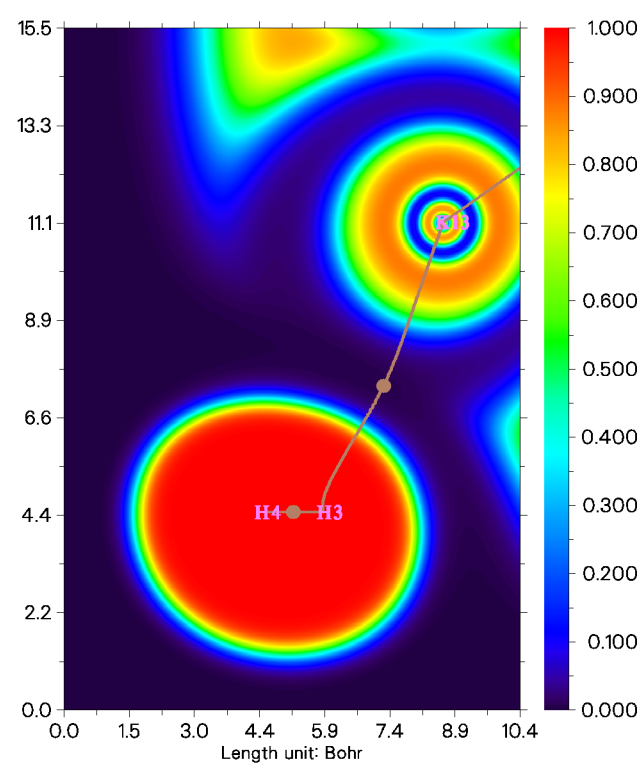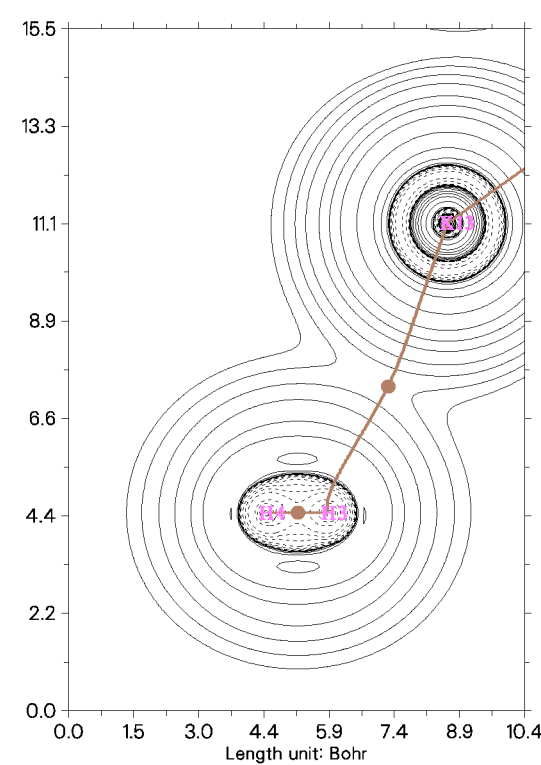

(c)

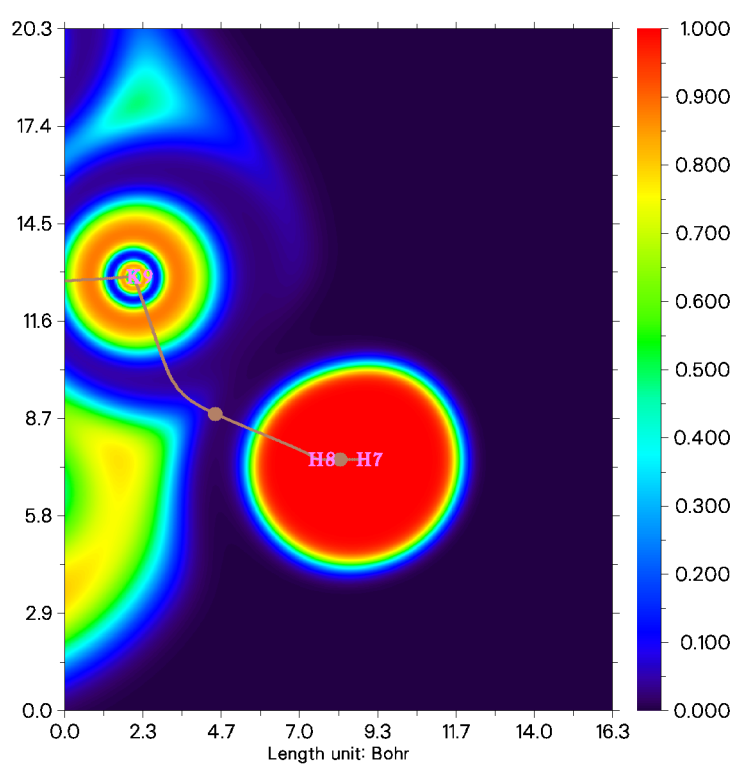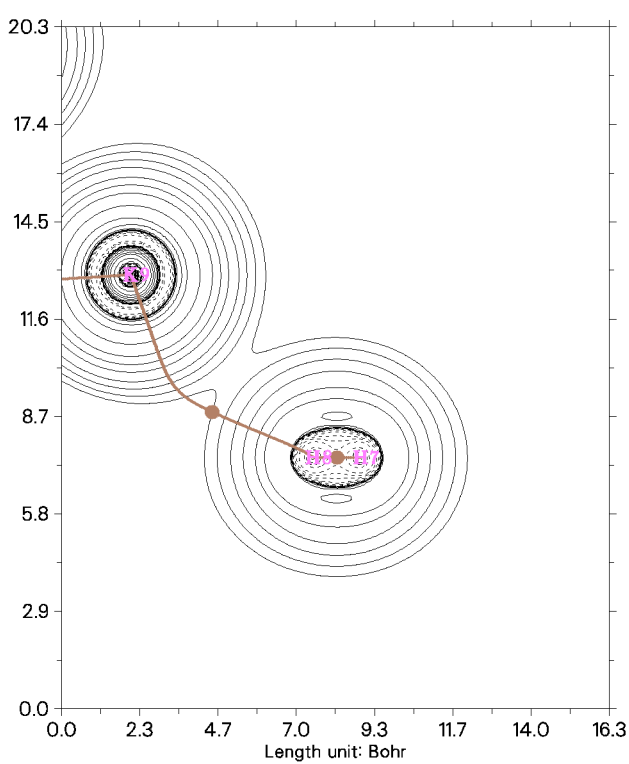

(d)

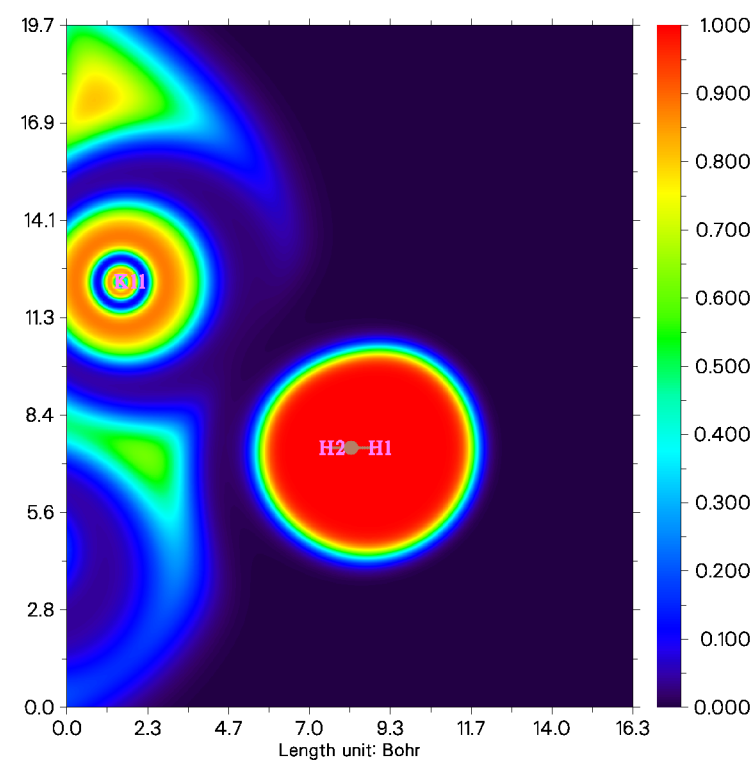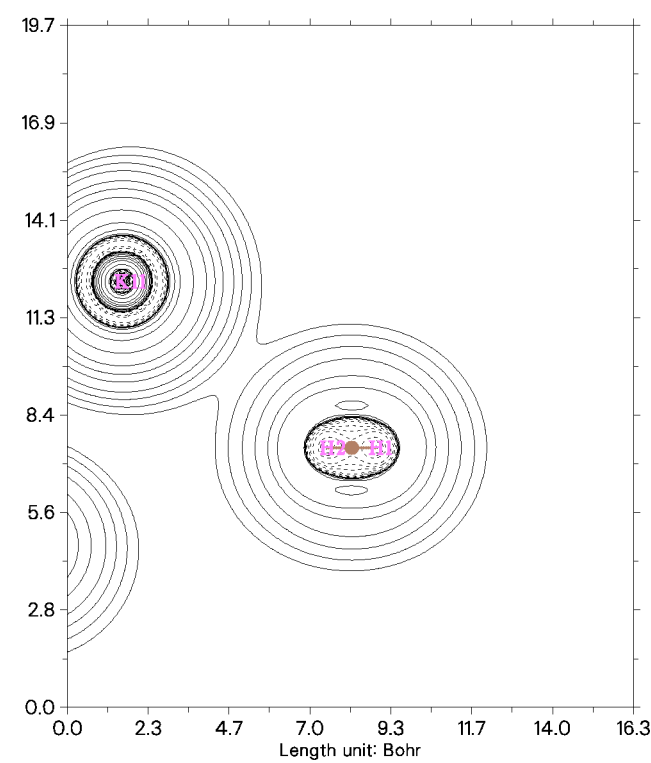

Supplement: d5cp04393j2.zip [file fig_5-eps-converted-to.pdf › SI_Source/fig_5-eps-converted-to.pdf]

(a)

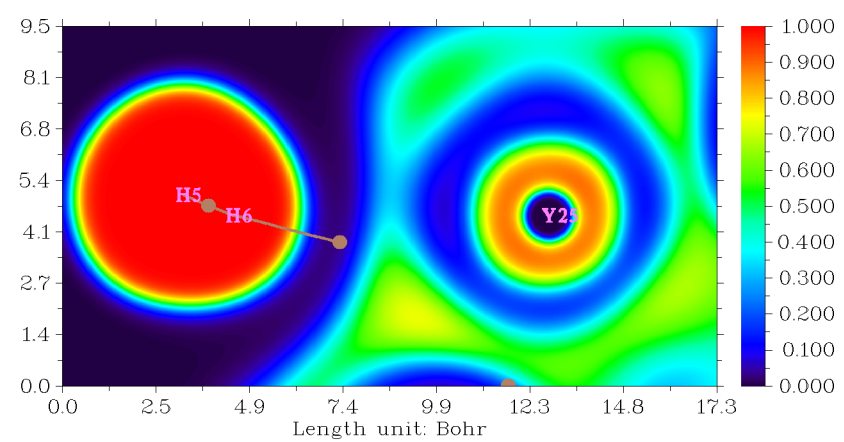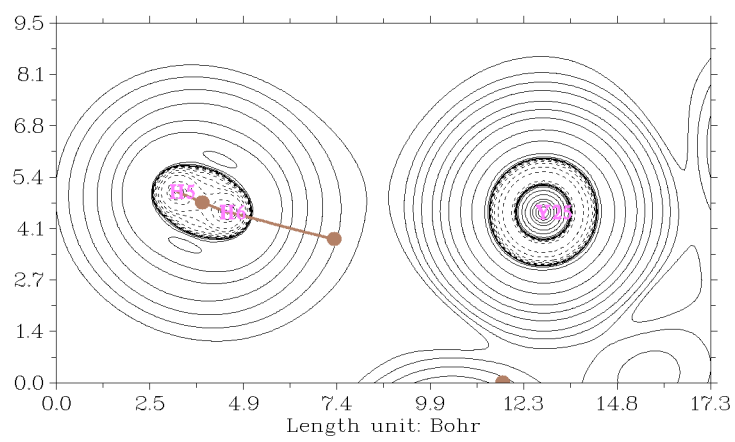

(b)

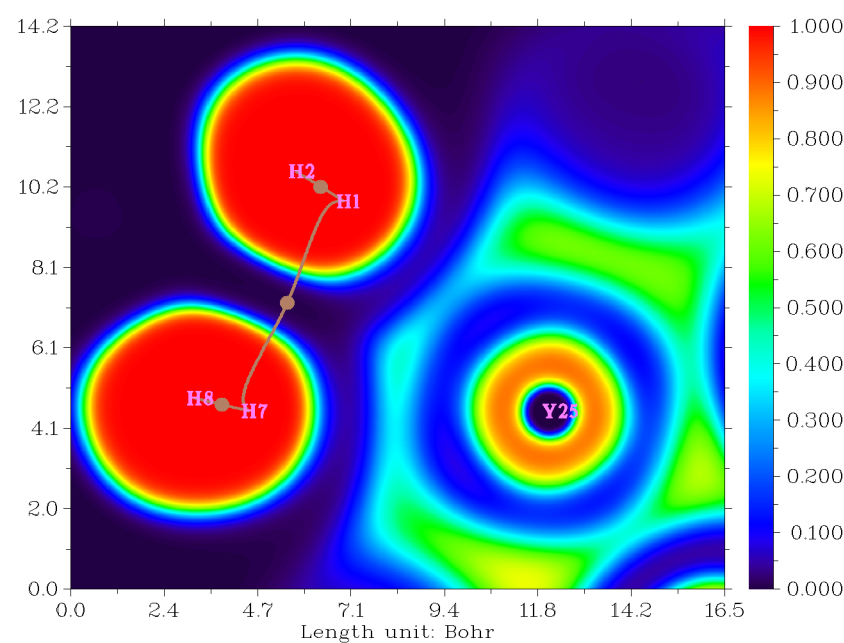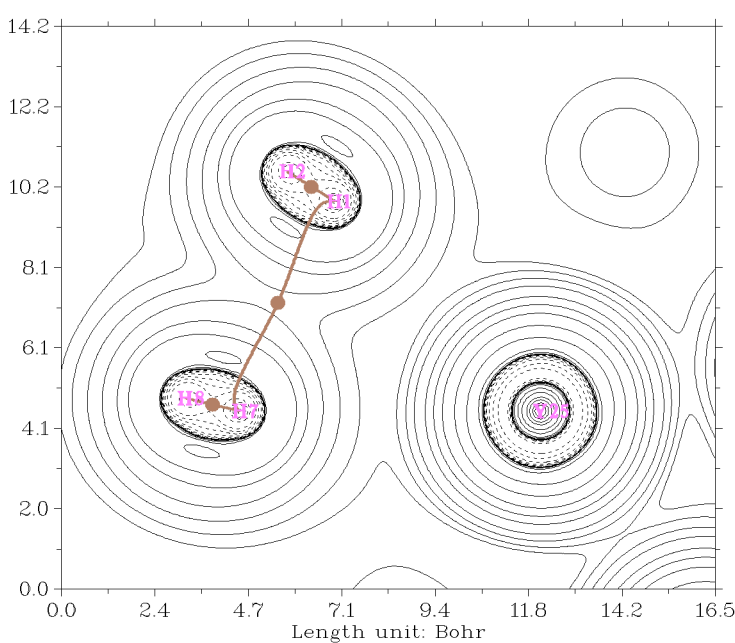

(c)

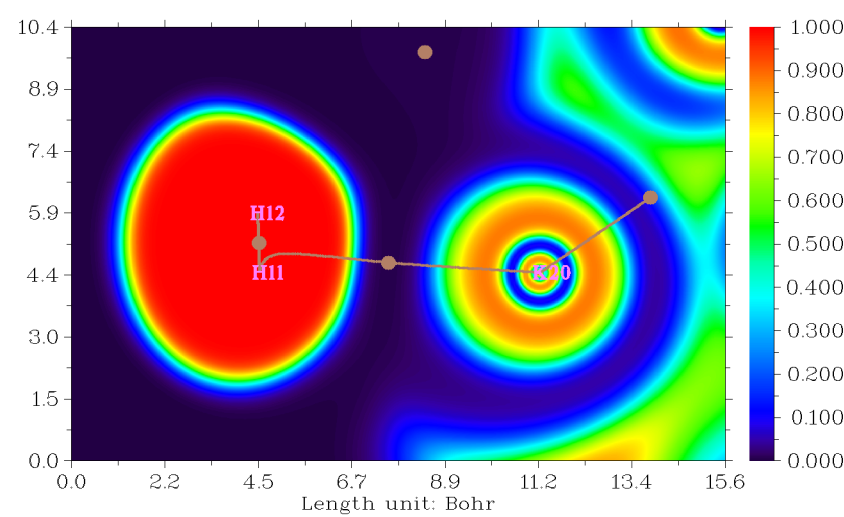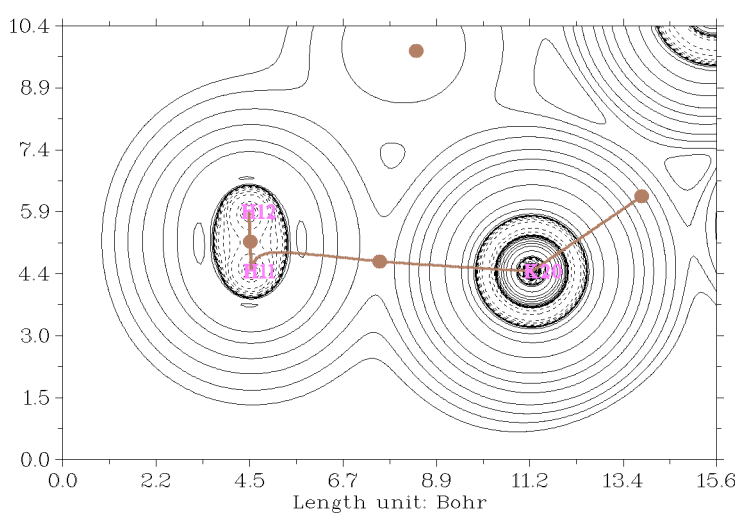

(d)

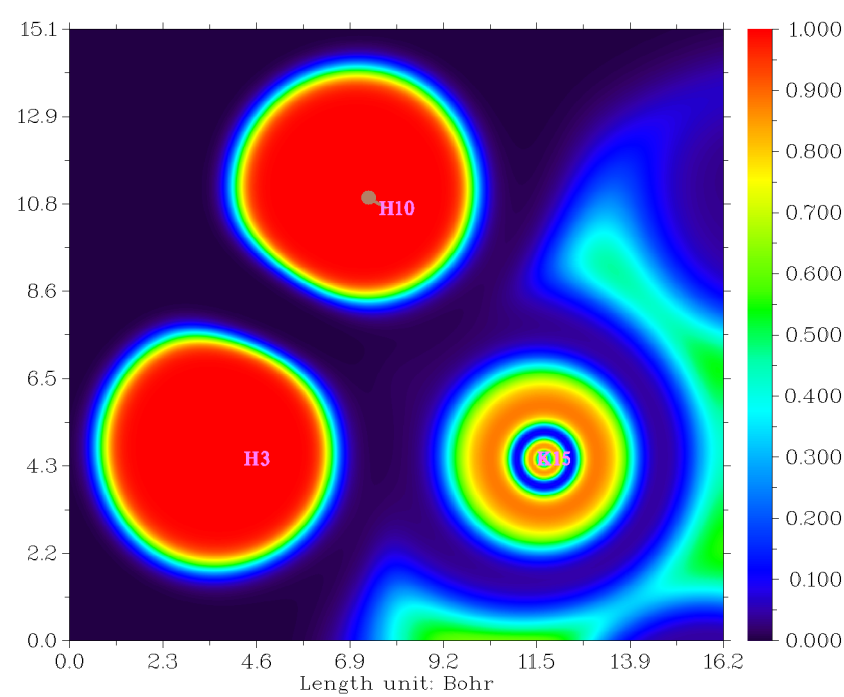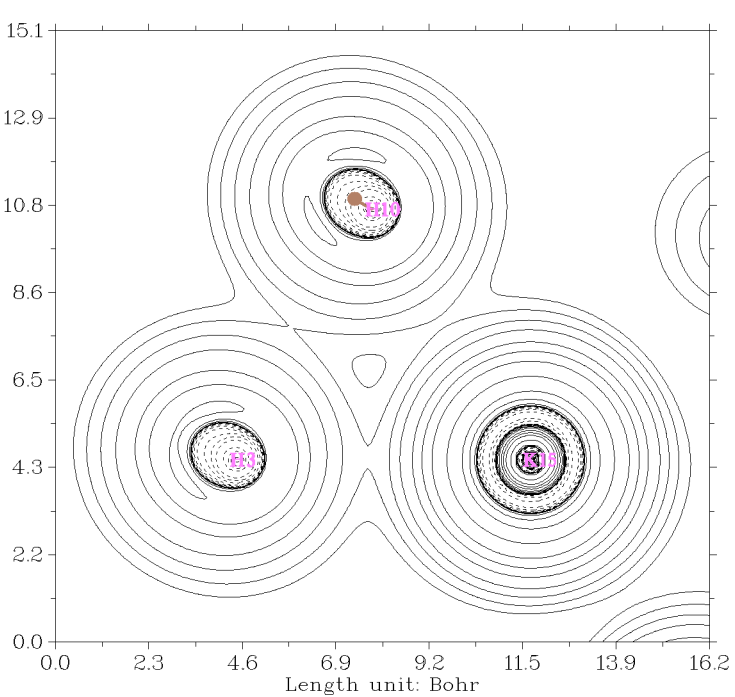

(e)

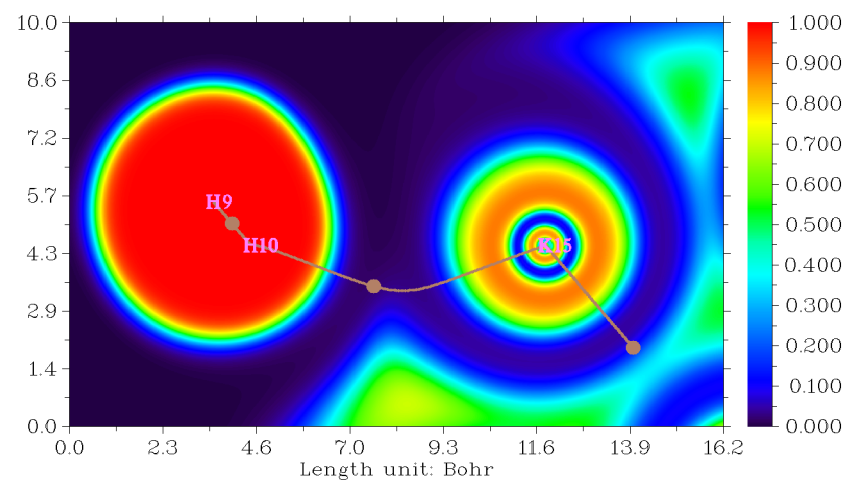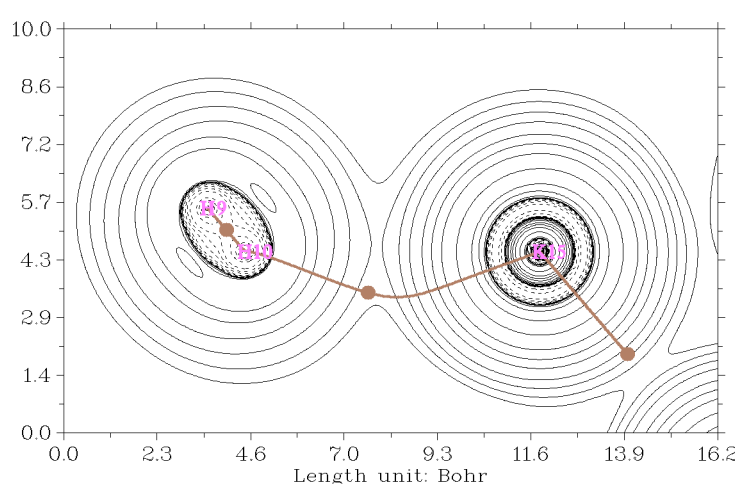

Supplement: d5cp04393j2.zip [file fig_6-eps-converted-to.pdf › SI_Source/fig_6-eps-converted-to.pdf]
